# Supplementary material for: Fire Usage and Ancient Hominin Detoxification Genes: Protective Ancestral Variants Dominate While Additional Derived Risk Variants Appear in Modern Humans
Source: PLoS One. 2016 Sep 21;11(9):e0161102. doi: 10.1371/journal.pone.0161102 (PMC5031311; doi:10.1371/journal.pone.0161102)
Supplement: S4 Table — (XLSX) [file pone.0161102.s004.xlsx]

## Sheet: Sheet1
CYP1B1 cDNA positions that are different between chimpanzee and human, and the corresponding alleles of the human, chimpanzee and gorilla reference genomes, and of the PanMap chimpanzees.
Nucleotide position in cDNA1)	Nucleotide position on chromosome 2 (GRCh37/hg19)	Strand orientation of listed base	Modern human reference genome GRCh37/hg19	Chimpanzee reference genome CSAC 2.1.4/panTro4	Chimpanzee PanMap # = chimp ref.2)	Gorilla reference genome gorGor3.1/gorGor3	Polymorphism known in modern humans	Amino acid change Human > Chimpanzee		Chimpanzee- specific
142	38302390	Negative	G	C	9; 1 no data	C	rs10012	Arg48Gly
355	38302177	Negative	C	A	5; 5 no data	A	rs1056827	Ala119Ser
729	38301803	Negative	C	A	8; 2 no data	gap	rs9341249	Val243Val	Synonymous
925	38301607	Negative	G	C	10	C	─	His309Asp		X
929	38301603	Negative	C	T	10	T	─	Gly310Asp		X
970	38301562	Negative	T	C	8; 2 = ? 3)	T	─	Ile324Val		X
1294	38298203	Negative	C	C	10	C	rs1056836	Val432Val	Synonymous
1347	38298150	Negative	A	G	10	G	rs1056837	Asp449Asp	Synonymous
1351	38298146	Negative	G	A	10	G	─	Leu451Phe		X
1413	38298084	Negative	A	G	10	A	─	Ile471Ile	Synonymous	X
1474	38298023	Negative	C	T	10	T	─	Asp492Asn		X
1605	38297892	Negative	A	C	10	C	─	Asn535Lys		X
1) Position number 1 corresponds with the first nucleotide of the translation start codon.
2) Number of PanMap chimpanzees identical to the chimpanzee CSAC 2.1.4/panTro4 reference genome (out of 10 individuals).
3) For 2 out of 10 chimpanzees only few data of low base quality are available; both possibly C, but unsure.
